# Supplementary material for: Synthesis, characterization and optical property of flower-like indium tin sulfide nanostructures
Source: Royal Society of Chemistry journal article supplement (doi:10.1039/b814602k), 2009-01-01
Supplement: b814602k.pdf [file b814602k.pdf]

## Supporting Information

### Synthesis, Characterization and Optical Property of Flowerlike Indium Tin Sulfide Nanostructure

Yongqian Lei,<sup>a,b</sup> Yan Xing,<sup>a,b</sup> Weiqiang Fan,<sup>a,b</sup> Shuyan Song,<sup>a,b</sup> Hongjie Zhang,<sup>\*a</sup>

<sup>a</sup>State Key Laboratory of Rare Earth Resource Utilizations, Changchun Institute of Applied Chemistry, Chinese Academy of Sciences, Changchun, 130022, Jilin, China.

E-mail: [hongjie@ciac.jl.cn](mailto:hongjie@ciac.jl.cn); Fax: +86-431-85698041; Tel: +86-431-85262127

<sup>b</sup>Graduate School of the Chinese Academy of Sciences, Beijing, 100039, P. R. China

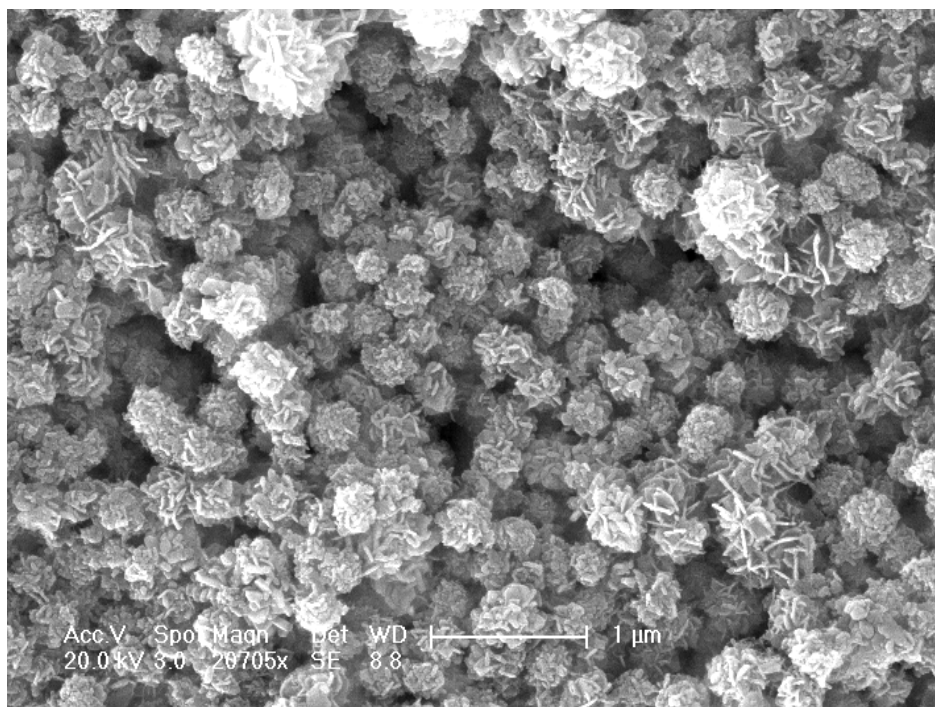

Figure S1 overall image of the flowerlike sample

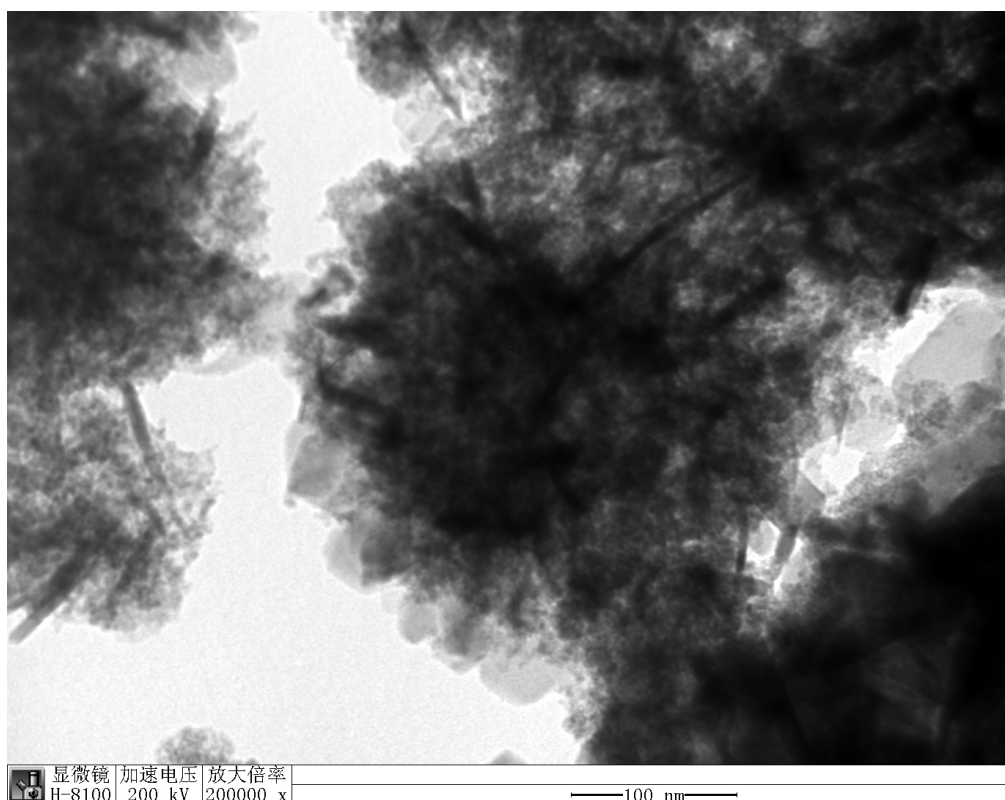

Figure S2 TEM image of the individual flowerlike nanostructure.

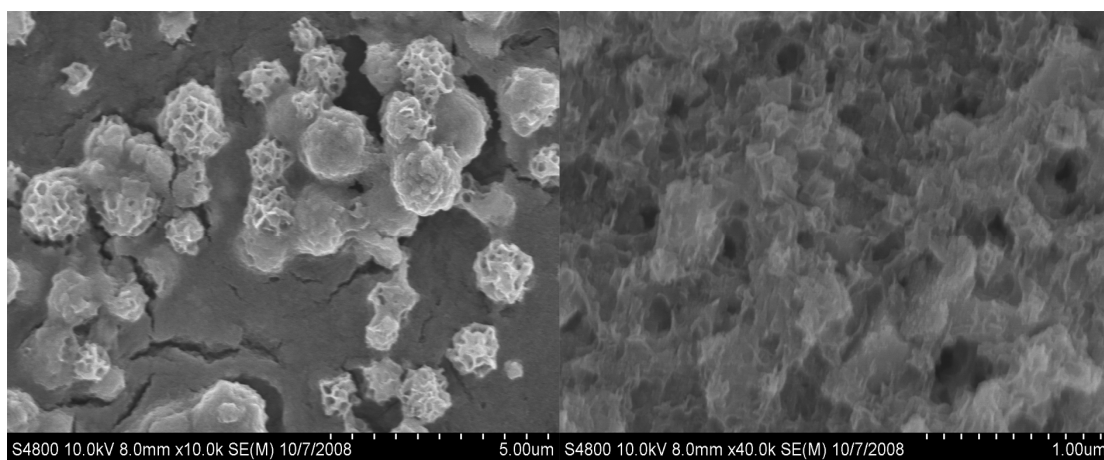

Figure S3 the prepared samples at different solution pH value: left pH=3.4; right pH=7.8

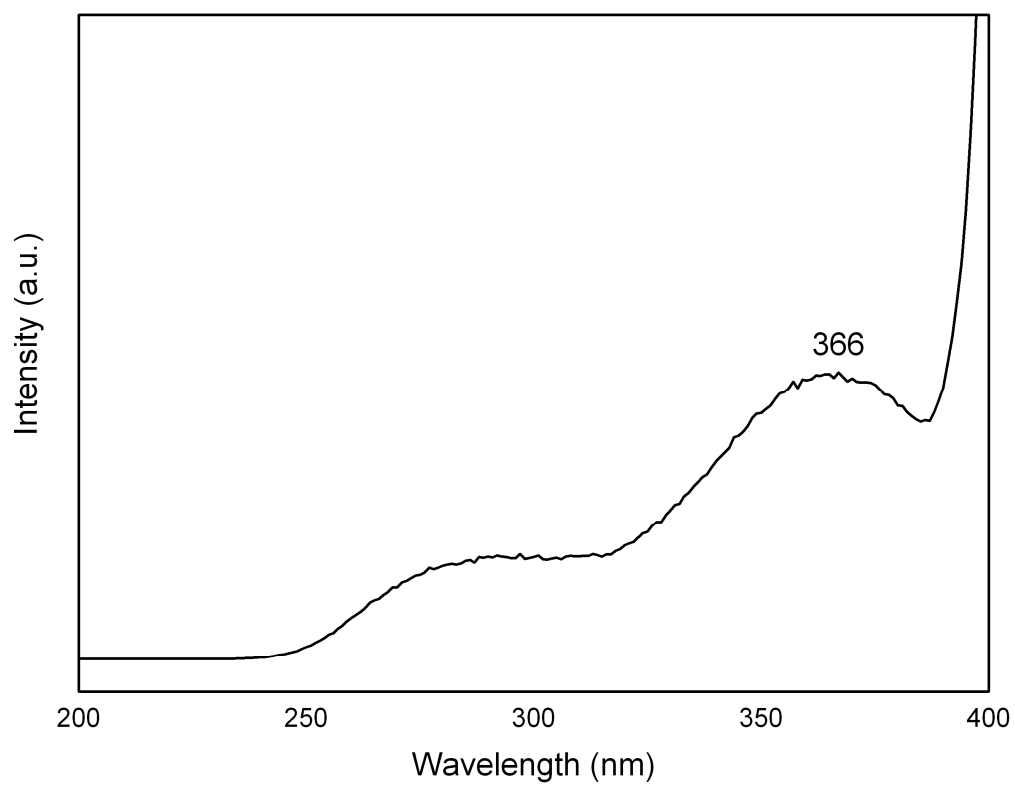

Figure S4 excitation spectrum of the sample
